# Supplementary material for: Involvement of the FOXO6 transcriptional factor in breast carcinogenesis
Source: PubMed Central journal article supplement (PMC5800916; doi:10.18632/oncotarget.23779), 2017-12-30
Supplement: oncotarget-09-7464-s001.pdf [file oncotarget-09-7464-s001.pdf]

## Involvement of the FOXO6 transcriptional factor in breast carcinogenesis

### SUPPLEMENTARY MATERIALS

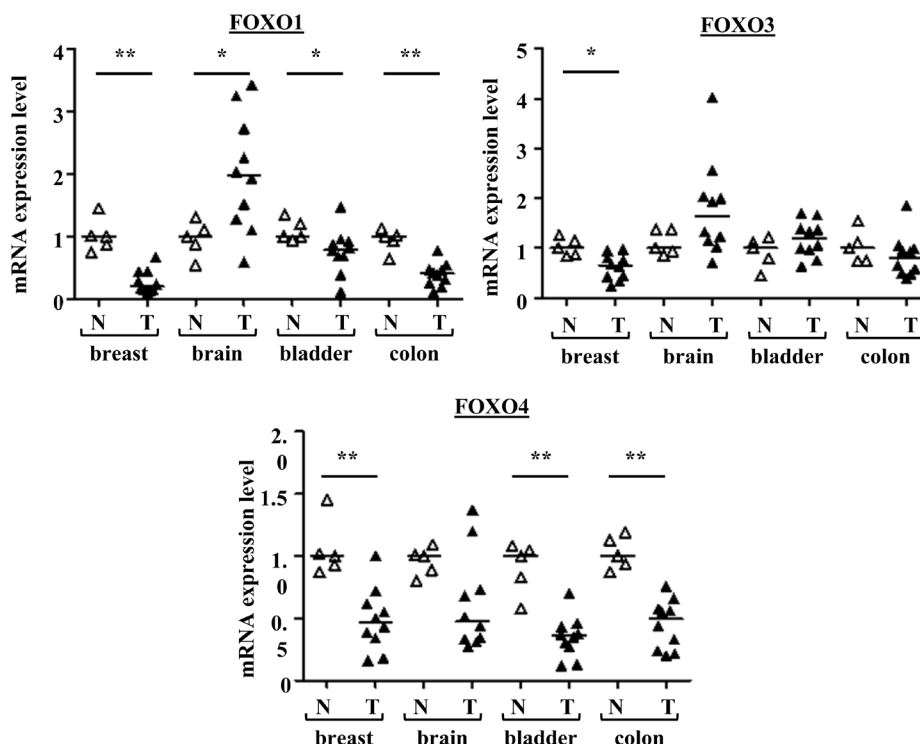

**Supplementary Figure 1: FOXO1, FOXO3, and FOXO4 mRNA expressions in various cancers and normal tissues.** Scatter dot plot with median of qRT-PCR data for FOXO1, FOXO3, and FOXO4 in the series of breast, brain, bladder and colon tissues ( $n = 5$  normal tissues and  $n = 10$  tumour tissues for each).  $p$ -values (Mann-Whitney  $U$  Test) are indicated: \*,  $0.01 < p\text{-value} < 0.05$ ; \*\* $p\text{-value} < 0.01$ .

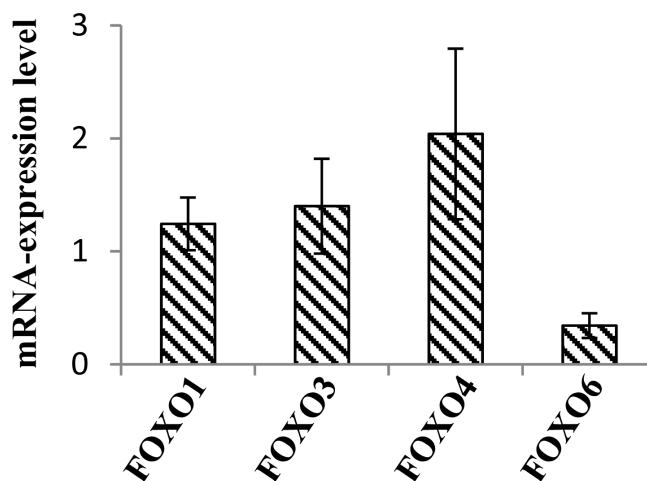

**Supplementary Figure 2: Evaluation of the specificity of FOXO6 siRNA.** MDA-MB-468 cells were transfected with control siRNA or FOXO6 siRNA. Six days after transfection, total mRNA was extracted and FOXO1, 3, 4 and 6 expression levels were determined by qRT-PCR. For each FOXO, the mRNA expression detected in cells transfected with FOXO6 siRNA was normalised to that detected in cells transfected with control siRNA. Results are expressed as mean  $\pm$  SD of three independent experiments.

**Supplementary Table 1: mRNA expression of *FOXO* genes in different human normal tissues**

| <b>Tissue</b>    | <b>FOXO1</b> | <b>FOXO3</b> | <b>FOXO4</b> | <b>FOXO6</b> |
|------------------|--------------|--------------|--------------|--------------|
| Breast           | 1938         | 442          | 1697         | 77           |
| Ovary            | <b>4162</b>  | 522          | <b>4891</b>  | 132          |
| Brain (whole)    | 450          | 276          | 2114         | 91           |
| Brain cerebellum | 284          | 726          | 1747         | 19           |
| Small Intestine  | 1152         | 402          | 1188         | 59           |
| Thyroid          | 2264         | 390          | 919          | 259          |
| Heart            | 2190         | 507          | 1524         | 99           |
| kidney           | 1485         | 460          | 1336         | 47           |
| Liver            | 2032         | 400          | 1279         | 13           |
| Lung             | 3176         | 723          | 2358         | 155          |
| Trachea          | 2316         | 567          | 1004         | 93           |
| Colon            | 1406         | 320          | 953          | 36           |
| Bone marrow      | 872          | <b>906</b>   | 2774         | 16           |
| Spleen           | 2197         | 471          | 1240         | 72           |
| Thymus           | 1480         | 424          | 1001         | 149          |
| Skeletal Muscle  | <b>4273</b>  | <b>906</b>   | <b>4669</b>  | 149          |
| Testis           | 200          | 67           | 309          | 18           |
| Uterus           | <b>5060</b>  | 552          | 1170         | 119          |
| Adrenal Gland    | 2276         | 302          | <b>6818</b>  | 85           |
| Salivary Gland   | 1105         | 373          | 1845         | 117          |
| Spinal Cord      | 2068         | 519          | 1748         | 81           |
| Fetal brain      | 409          | 774          | 399          | <b>502</b>   |
| Fetal liver      | 2394         | 623          | 3220         | 9            |
| Placenta         | 517          | 224          | <b>8828</b>  | 109          |
| <b>Mediane</b>   | 1938         | 442          | 1697         | 91           |

**Supplementary Table 2: mRNA expression of *FOXO* genes in breast cell lines**

| Cell Line     | status | FOXO1 | FOXO3 | FOXO4 | FOXO6        |
|---------------|--------|-------|-------|-------|--------------|
| hTert HME1    | N      | 0.35  | 1.55  | 0.18  | 0.39         |
| MCF-12A       | N      | 1.55  | 1.33  | 0.60  | 3.16         |
| MCF-12F       | N      | 2.00  | 0.76  | 1.78  | 3.02         |
| HMEC          | N      | 0.53  | 1.00  | 1.49  | 0.89         |
| MCF-10-2A     | N      | 0.61  | 0.62  | 1.12  | 3.43         |
| MCF-10A       | N      | 1.00  | 0.64  | 1.00  | 1.00         |
| 184B5         | N      | 1.65  | 1.35  | 0.63  | 0.79         |
| HCC-1428      | T      | 0.23  | 0.87  | 1.67  | <b>54.92</b> |
| BT483         | T      | 0.27  | 1.55  | 1.14  | <b>34.02</b> |
| MDA-MB-361    | T      | 0.14  | 1.59  | 0.58  | 12.39        |
| HCC-202       | T      | 0.65  | 2.12  | 2.55  | <b>40.16</b> |
| HCC-1187      | T      | 1.18  | 1.19  | 0.92  | 15.12        |
| T47D          | T      | 0.17  | 0.78  | 0.60  | 8.38         |
| MDA-MB-134-VI | T      | 0.08  | 0.46  | 1.06  | 28.65        |
| PMC42         | T      | 1.31  | 1.83  | 0.34  | 11.64        |
| MCF7          | T      | 0.23  | 1.38  | 0.35  | 11.72        |
| BT474         | T      | 0.18  | 2.81  | 0.64  | 21.59        |
| SKBR3         | T      | 0.56  | 0.45  | 0.32  | 29.38        |
| CAMA1         | T      | 0.24  | 0.81  | 0.70  | 1.95         |
| MDA-MB-231    | T      | 0.06  | 0.22  | 0.16  | 6.01         |
| ZR75-1        | T      | 0.08  | 0.54  | 0.49  | 14.31        |
| HCC-1569      | T      | 0.19  | 1.20  | 0.68  | 4.56         |
| HCC-1954      | T      | 0.89  | 0.99  | 0.32  | 22.12        |
| MDA-MB-453    | T      | 0.14  | 0.90  | 0.98  | 22.78        |
| MDA-MB-415    | T      | 0.21  | 2.22  | 4.13  | <b>91.66</b> |
| HCC-1599      | T      | 0.06  | 0.51  | 0.32  | 5.02         |
| HCC-38        | T      | 0.29  | 4.75  | 1.49  | <b>93.90</b> |
| MDA-MB-436    | T      | 0.24  | 1.09  | 0.11  | 5.41         |
| MDA-MB-468    | T      | 0.11  | 1.26  | 0.49  | <b>35.32</b> |
| Hs 578T       | T      | 0.35  | 1.23  | 0.68  | 2.82         |
| HCC-1143      | T      | 0.23  | 1.00  | 0.51  | 3.60         |
| HCC-70        | T      | 1.34  | 1.61  | 1.42  | <b>39.04</b> |
| BT549         | T      | 0.13  | 2.53  | 0.26  | 0.73         |
| BT20          | T      | 0.80  | 3.40  | 0.41  | <b>32.53</b> |
| MDA-MB-157    | T      | 0.19  | 0.67  | 0.14  | 5.27         |
| HCC-1937      | T      | 1.14  | 2.16  | 0.42  | 17.29        |
| HBL100        | T      | 0.09  | 0.93  | 0.26  | 4.94         |
| HCC1500       | T      | 0.00  | 0.39  | 0.92  | 27.02        |
| MDA-MB435S    | T      | 0.24  | 1.19  | 1.55  | 0.18         |

N: normal breast cell lines; T: tumorigenic breast cell lines; in bold: overexpression (defined as Ct values under 30 (values above 32 ( $2^{\Delta Ct} = 2^{35-30} = 32$ ))).

**Supplementary Table 3: Characteristics of the 527 breast tumors**

| Clinical biological parameters        | Number of patients (%) | Number of patients with metastases (%) | <i>p</i> -value <sup>a</sup> |
|---------------------------------------|------------------------|----------------------------------------|------------------------------|
| Total                                 | 527 (100)              | 210 (39.8)                             |                              |
| Age                                   |                        |                                        |                              |
| ≤50                                   | 125 (23.7)             | 52 (41.6)                              | 0.52 (NS)                    |
| >50                                   | 402 (76.3)             | 158 (39.3)                             |                              |
| SBR histological grade <sup>b,c</sup> |                        |                                        |                              |
| I                                     | 60 (11.7)              | 12 (20.0)                              | <b>0.0019</b>                |
| II                                    | 241 (47.1)             | 100 (41.5)                             |                              |
| III                                   | 211 (41.2)             | 94 (44.5)                              |                              |
| Lymph node status <sup>d</sup>        |                        |                                        |                              |
| 0                                     | 159 (30.5)             | 48 (30.2)                              | <b>&lt;0.0000001</b>         |
| 1–3                                   | 250 (47.9)             | 88 (35.2)                              |                              |
| >3                                    | 113 (21.6)             | 72 (63.7)                              |                              |
| Macroscopic tumor size <sup>e</sup>   |                        |                                        |                              |
| ≤25 mm                                | 248 (48.0)             | 77 (31.0)                              | <b>0.000015</b>              |
| >25 mm                                | 269 (52.0)             | 132 (49.1)                             |                              |
| ERα status                            |                        |                                        |                              |
| Negative                              | 181 (34.3)             | 76 (42.0)                              | 0.10 (NS)                    |
| Positive                              | 346 (65.7)             | 134 (38.7)                             |                              |
| PR status                             |                        |                                        |                              |
| Negative                              | 255 (48.4)             | 110 (43.1)                             | <b>0.025</b>                 |
| Positive                              | 272 (51.6)             | 100 (36.8)                             |                              |
| ERBB2 status                          |                        |                                        |                              |
| Negative                              | 397 (75.3)             | 153 (38.5)                             | 0.17 (NS)                    |
| Positive                              | 130 (24.7)             | 57 (43.8)                              |                              |
| Molecular subtypes                    |                        |                                        |                              |
| RH– ERBB2–                            | 102 (19.4)             | 38 (37.3)                              | 0.054 (NS)                   |
| RH– ERBB2+                            | 72 (13.7)              | 36 (50.0)                              |                              |
| RH+ ERBB2–                            | 295 (56.0)             | 115 (39.0)                             |                              |
| RH+ ERBB2+                            | 58 (11.0)              | 21 (36.2)                              |                              |
| Histological types <sup>f</sup>       |                        |                                        |                              |
| Ductal                                | 398 (89.6)             | 156 (39.2)                             | 1.00 (NS)                    |
| Lobular                               | 28 (6.3)               | 11 (39.3)                              |                              |
| Other                                 | 18 (4.1)               | 7 (38.9)                               |                              |
| PIK3CA mutation status <sup>h</sup>   |                        |                                        |                              |
| wild type                             | 299 (67.0)             | 123 (20.5)                             | 0.065 (NS)                   |
| mutated                               | 147 (33.0)             | 50 (34.0)                              |                              |

a: Log-rank test; NS: not significant; b: Scarff Bloom Richardson classification; c: informations available for 512 patients; d: informations available for 522 patients; e: informations available for 517 patients; f: informations available for 444 patients; h: informations available for 446 patients.

**Supplementary Table 4: Primer sequences used for qRT-PCR**

| <b>Gene</b> | <b>Upper primer (5' to 3')</b> | <b>Lower primer (5' to 3')</b> |
|-------------|--------------------------------|--------------------------------|
| TBP         | TGCACAGGAGCCAAGAGTGAA          | CACATCACAGCTCCCCACCA           |
| FOXO1       | GTCAAGAGCGTGCCCTACTTCA         | TGAACTTGCTGTGTAGGGACAGATTAT    |
| FOXO3       | AGATCTACGAGTGGATGGTGCGTT       | AATCGACTATGCAGTGACAGGTTGTG     |
| FOXO4       | TGGTCCGTACTGTACCCTACTTCA       | GGCGGATCGAGTTCTTCCAT           |
| FOXO6       | CCTGCGCATCAAGGGCAAG            | GCACTCGGGGAGCTGTGCGTC          |
